# Supplementary material
Source: Springer Nature journal article supplement (https://www.springermedizin.de/resource/supplementary/13075_2009_2760_MOESM1_ESM.pdf/9692822)

A

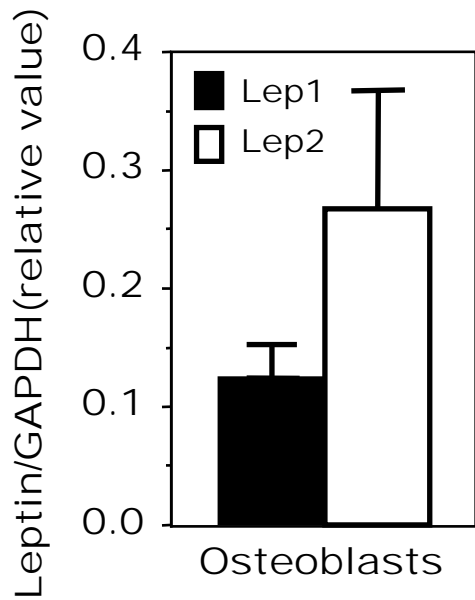

C

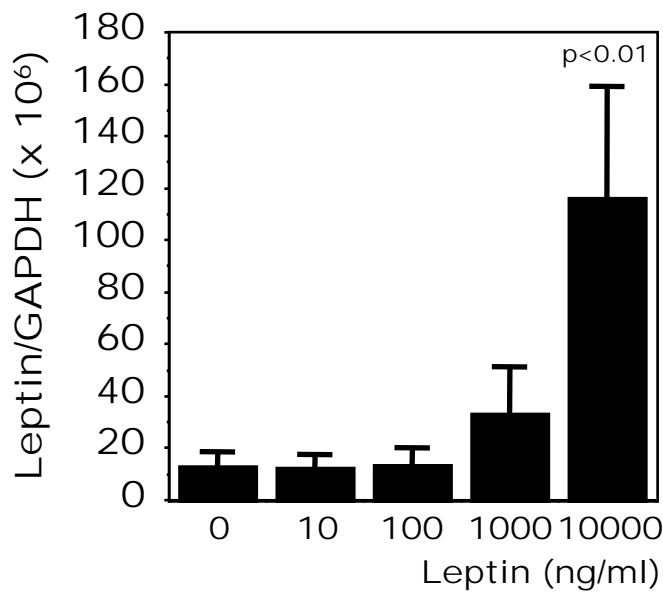

B

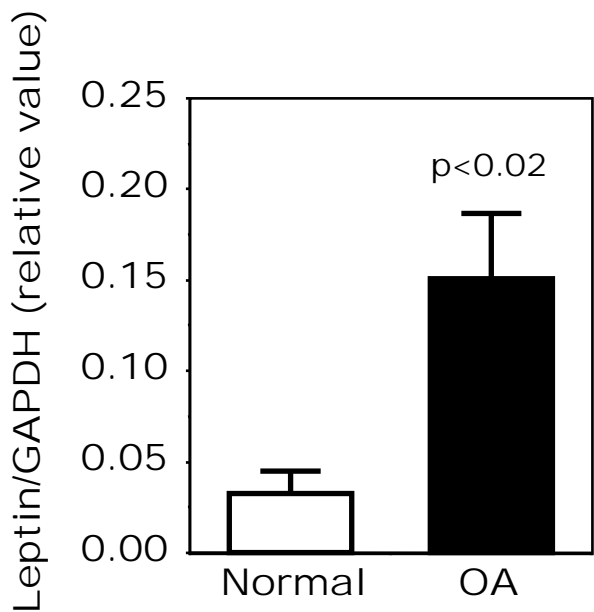

D

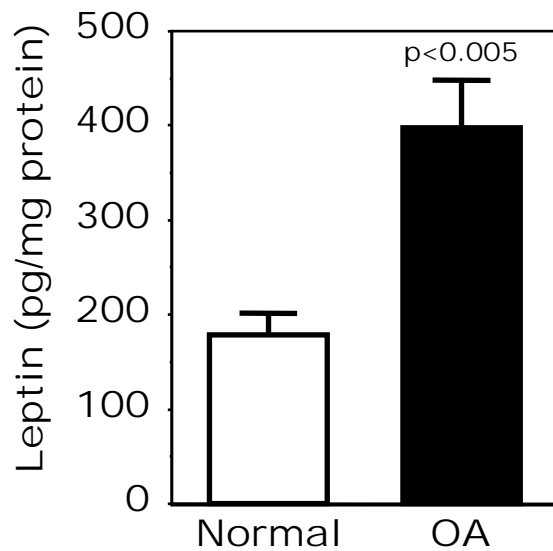

Supplement: MOESM1 [file 9692822]
